# Supplementary material
Source: bioRxiv or medRxiv preprint supplement (https://www.biorxiv.org/highwire/filestream/52843/field_highwire_adjunct_files/10/175505-9.pdf)

# Supplementary Figure 3

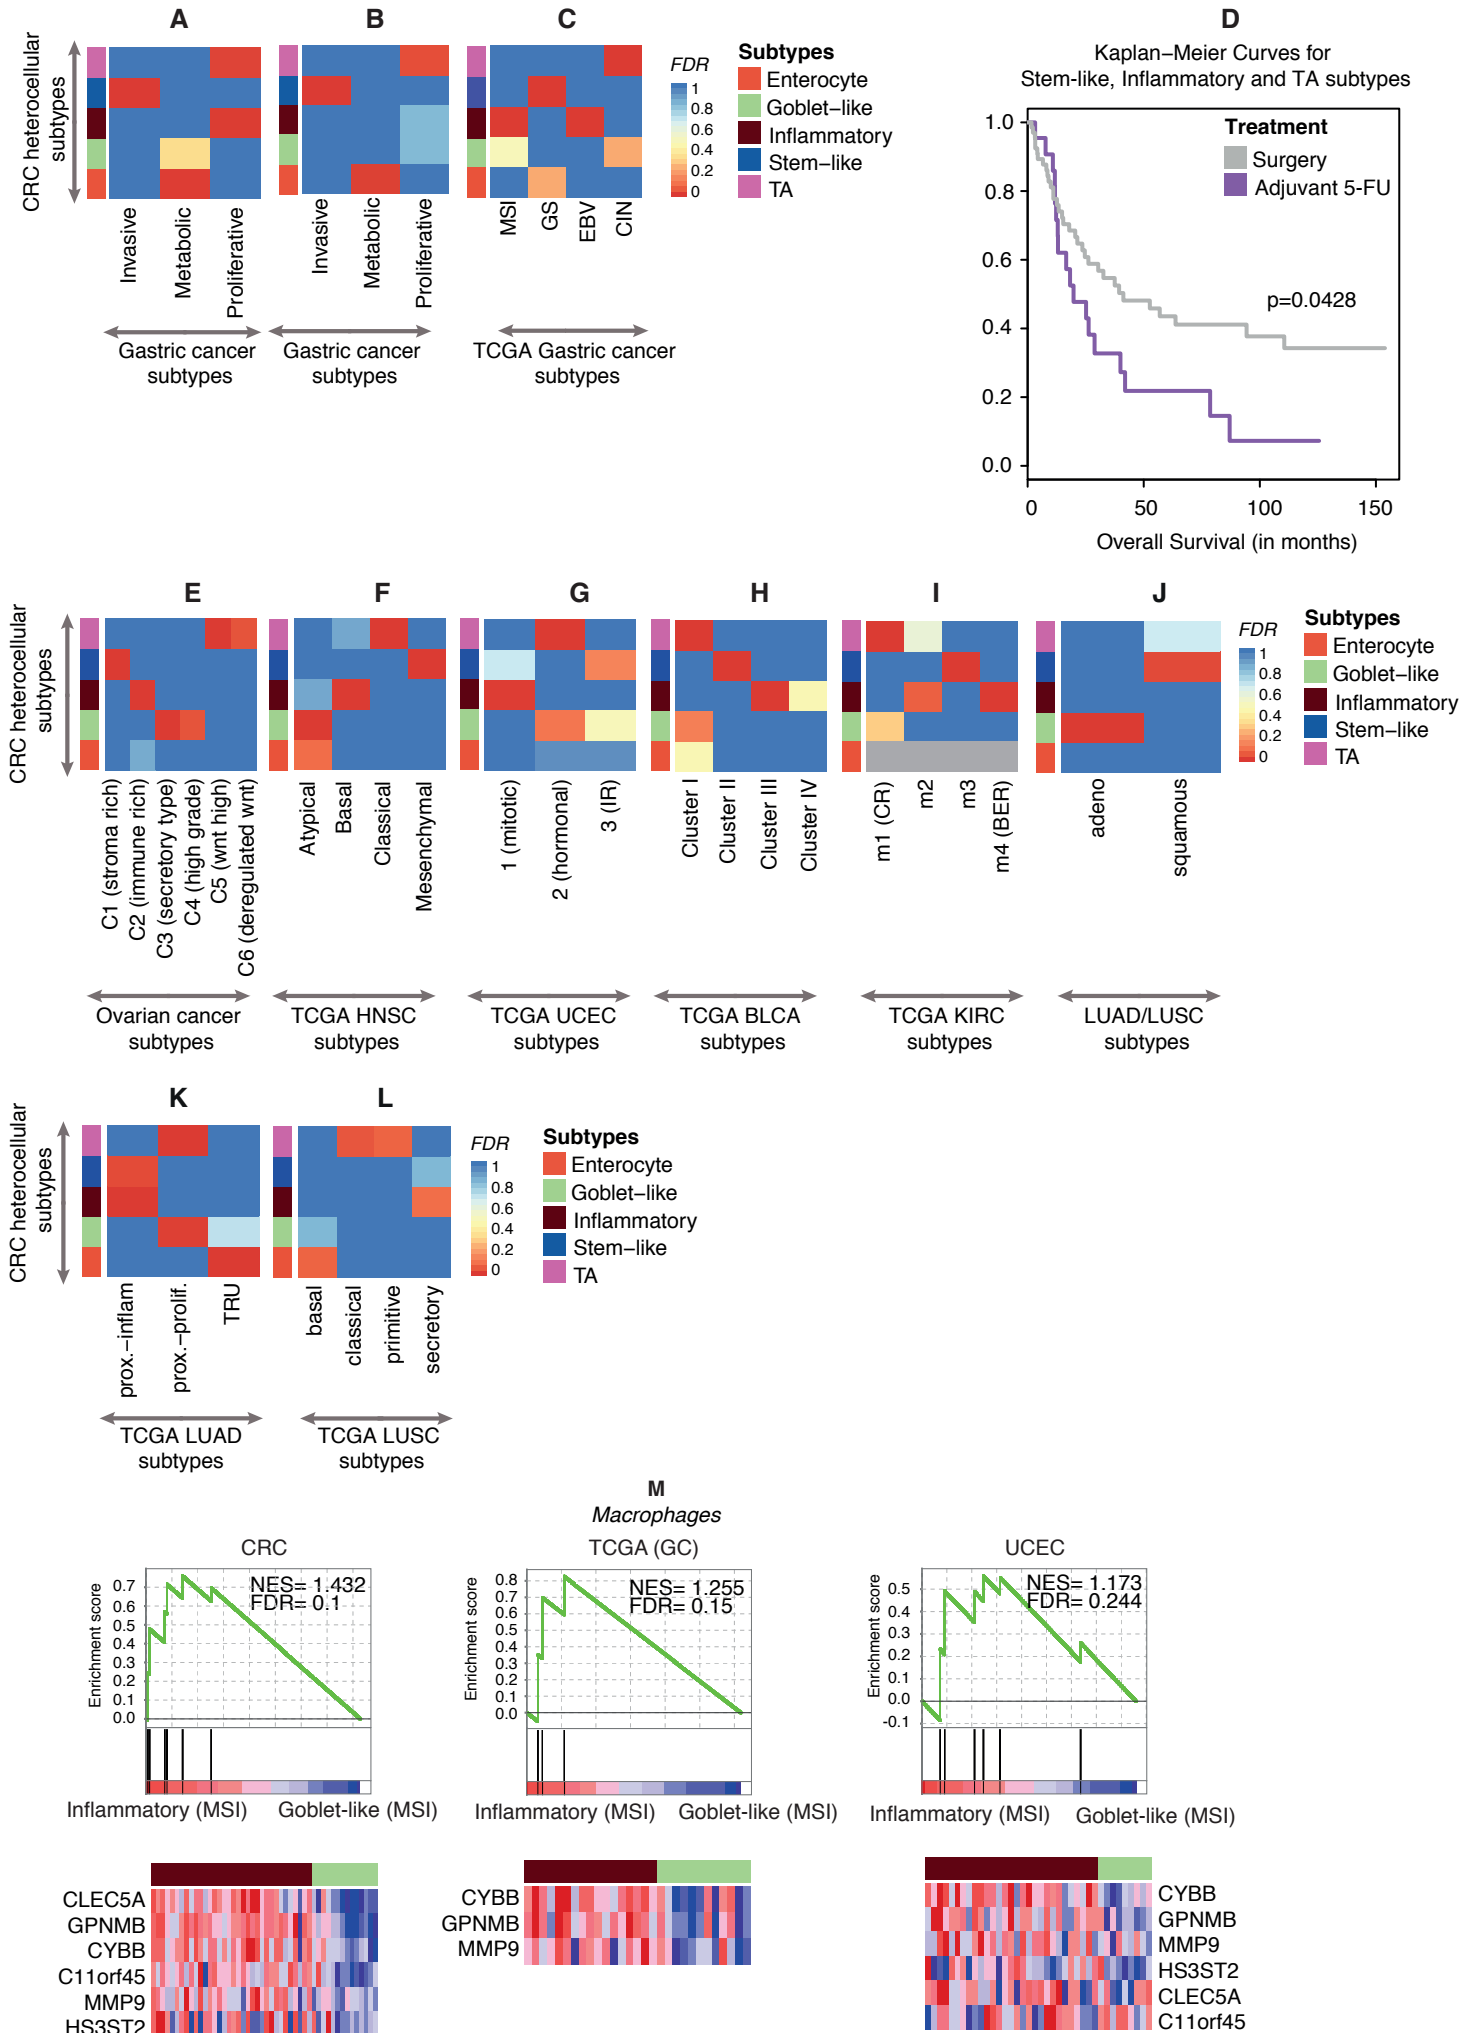

Supplement: Supplementary file [file 175505-9.pdf]
